# Supplementary material
Source: publisher site journal article supplement (https://www.dovepress.com/article/592970)
Supplement: Supplementary file 1 [file 592970%20Revised%20Supplementary%20Information.docx]

**Neutrophil-Membrane Biomimetic Hollow Mesoporous Silica Nanoparticles for Targeted Delivery of Imperatorin to Alleviate Cerebral Ischemia–Reperfusion Injury via Nrf2/ARE/Keap1 Pathway**

Feifei Chen1*, Hui Jiang2*, Xueyi Song3, Jianfeng Wang3, Xu Ma4, Quan Zhou3, Abdullah Al Mamun5, Lingna Li6, Yunfang Zhou3, Hongbin Xu1#, Shuanghu Wang3#

**Author Affiliations**

1Department of Pharmacy, The First Affiliated Hospital of Ningbo University, Ningbo, 315010, China

2Department of Pharmacy, The People's Hospital of Guangxi Zhuang Autonomous Region, Guangxi Academy of Medical Sciences, Nanning, 530021, China

3Central Laboratory of Lishui Hospital of Wenzhou Medical University, The First Affiliated Hospital of Lishui University, Lishui People's Hospital, Lishui, 323000, China

4Department of Pediatric Orthopaedics, Maternal and Child Health Hospital of Guangxi Zhuang Autonomous Region, Nanning, 530003, China

5Department of Pharmacy, American International University-Bangladesh (AIUB), 408/1 (Old KA 66/1), Kuratoli, Khilkhet, Dhaka-1229, Bangladesh

6 Department of Pharmacy, The Affiliated Hospital of Ningbo University, LiHuiLi Hospital, Ningbo, 315010, China

**These authors contributed equally to this work.*

**#Corresponding Author:**

[xuhongbin@tongji.edu.cn](mailto:xuhongbin@tongji.edu.cn) (Hongbin Xu), [wangshuanghu@lsu.edu.cn](mailto:wangshuanghu@lsu.edu.cn) (Shuanghu Wang)


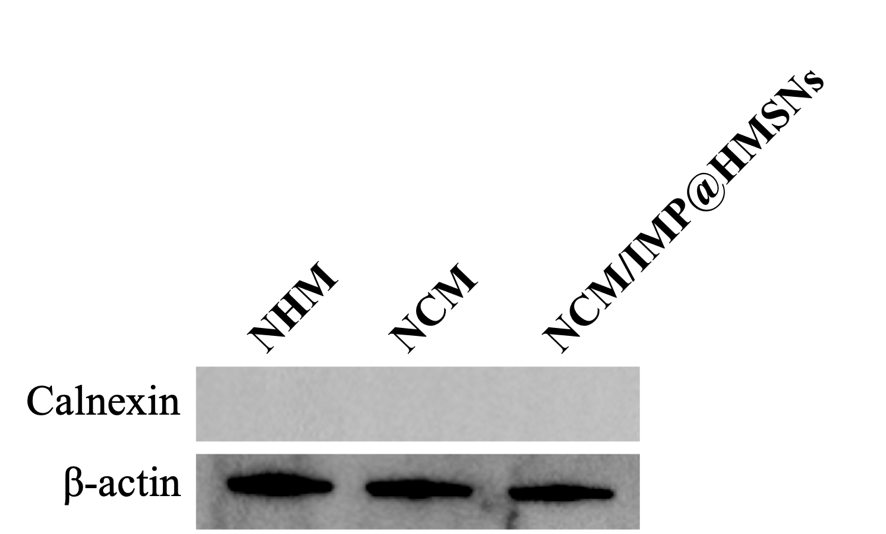


Figure. S1 Expression of intracellular marker Calnexin protein.


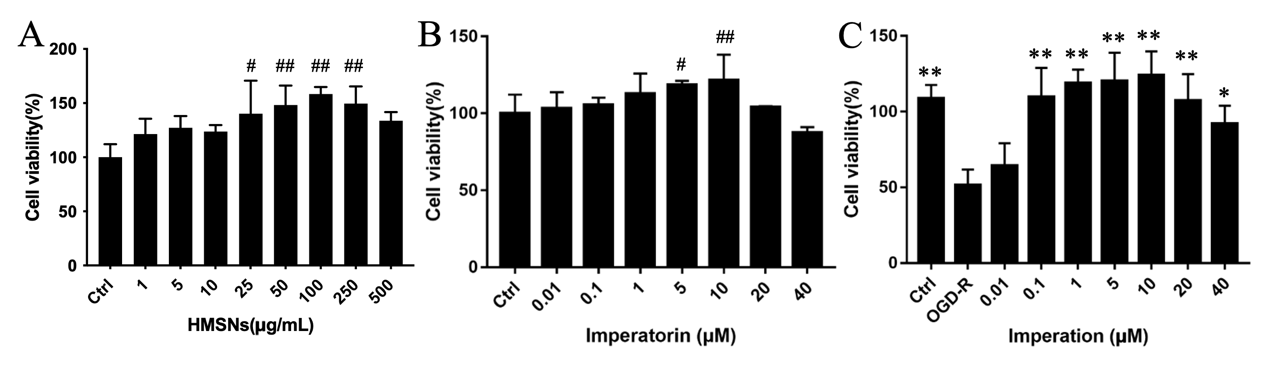


Figure. S2 (A)Biocompatibility of HMSNs at different concentrations toward SH-SY5Y cells. (B) Effects of imperatorin at different concentrations on the proliferation stability of SH-SY5Y cells. (C) Effects of IMP at different concentrations on cell viability of SH-SY5Y cells following OGD/R. #*p*<0.05, ##*p*<0.01, vs. Control group; **p*<0.05, ***p*<0.01, vs. OGD/R group (n=3).


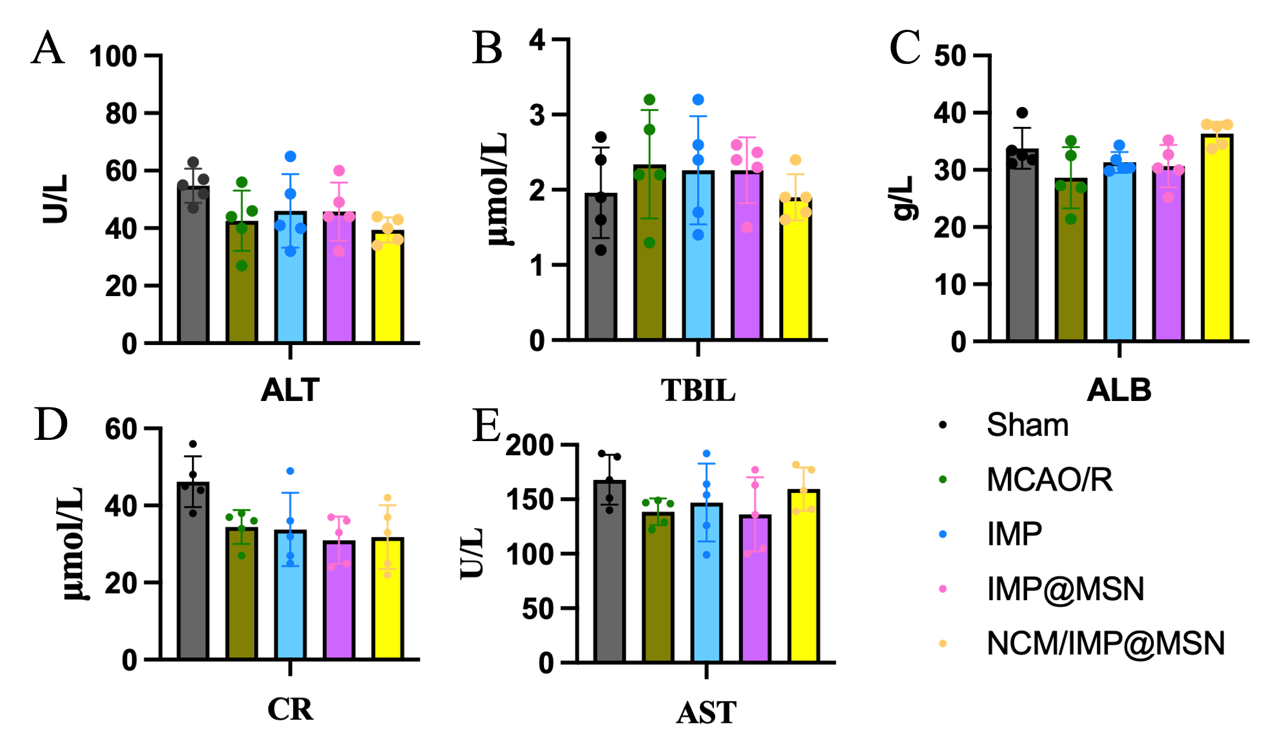


Figure. S3 The levels of (A) alanine aminotransferase (ALT), (B) total bilirubin (TBIL), (C) albumin (ALB), (D) creatinine (CR), and (E) aspartate aminotransferase (AST) in different treatments (n = 5).


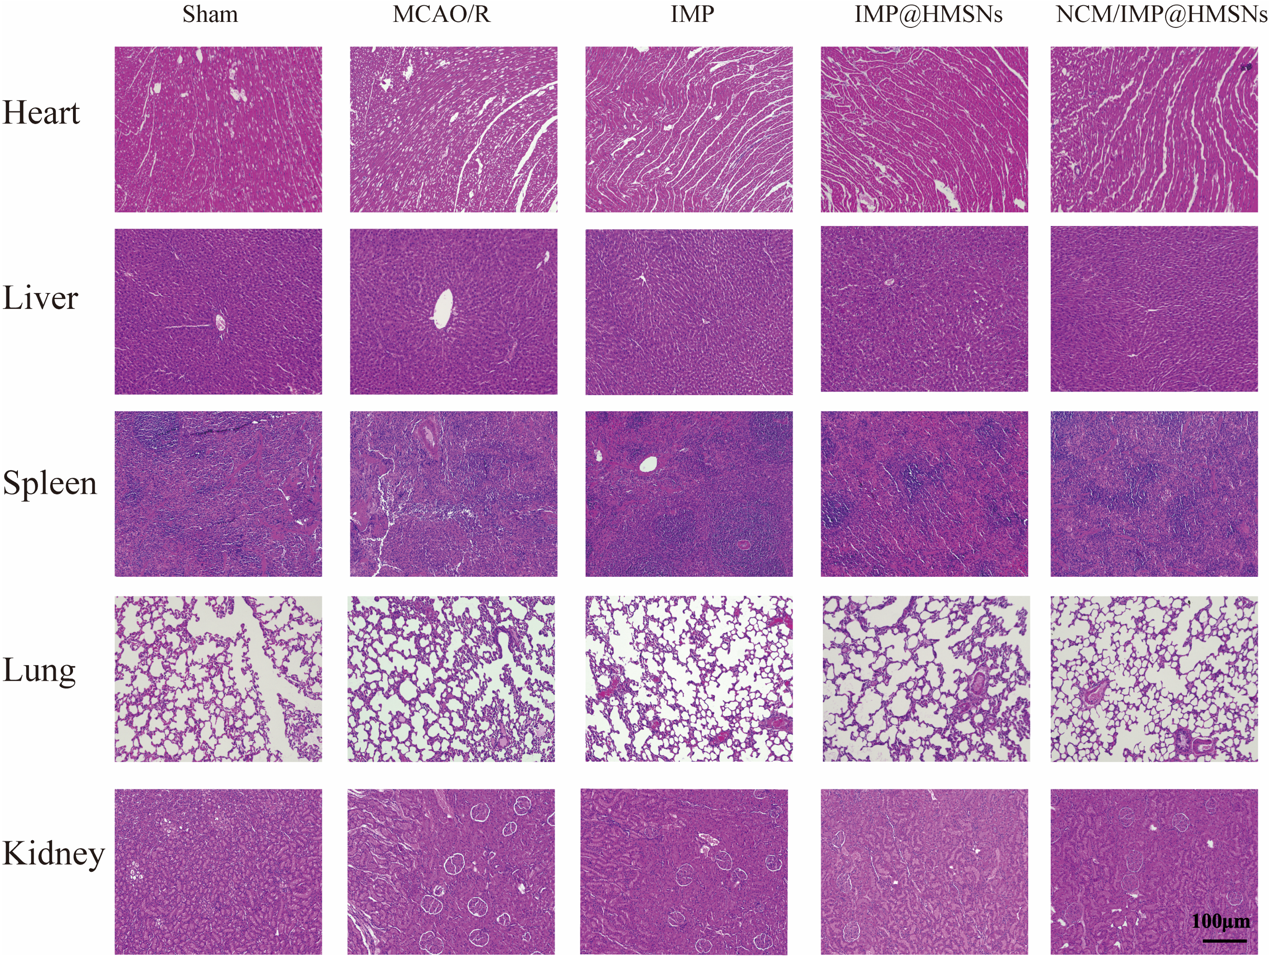


Figure S4 HE staining assays of heart, liver, spleen, lung, and kidney after treatments.
